# Supplementary material
Source: PubMed Central journal article supplement (PMC6825892)
Supplement: NIHMS1539285-supplement-1.pdf [file NIHMS1539285-supplement-1.pdf]

**Supplemental Figure 1. Selection of cases and controls from the Surveillance, Epidemiology and End Results (SEER)-Medicare linked data**

**Case Selection**

Women diagnosed with malignant ovarian or fallopian tube cancer as a their first cancer between 1994–2013  
 N=54 338

**Control Selection**

5% sample of women who are Medicare beneficiaries residing in SEER registry areas and do not have ovarian or fallopian tube cancer  
 N=648 379

- Unknown month of diagnosis  
n=365
- Unknown diagnostic confirmation/confirmation only from death certificate  
n=1 730
- Enrolled in Medicare for any reason other than age  
n=10 158
- Age at Diagnosis <68 or ≥90  
n=14 854
- Excluded due to histology (e.g., non-epithelial or non-carcinoma)  
n=2 580
- Not continuously enrolled in Medicare parts A and B in the 1 year period 2–3 years before cancer diagnosis  
n=1 834
- Enrolled in an HMO any time in the 1 year period 2–3 years before cancer diagnosis  
n=5 967

Cases  
 N=16 850

Medicare records searched for codes related to metabolic syndrome between 2 and 5 years before the diagnosis date (cases) or index date (controls)

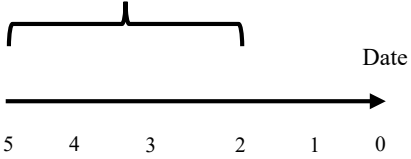

Three options for length of continuous Medicare enrollment (mutually exclusive, all women analyzed together, with adjustment for length of enrollment)

Enrolled in Medicare parts A and B, but not an HMO for the entire 3 year period 2-5 years before diagnosis/index date  
 Cases n=13 391; Controls n=178 780

Only enrolled for the 2 year period 2-4 years before diagnosis/index date  
 Cases n=1 739; Controls n=41 539

Only enrolled for the 1 year period 2-3 years before diagnosis/index date  
 Cases n=1 720; Controls n=61 559

Controls  
 N=281 878

- Died before 1994 or age 68, or were aged ≥90  
n=38 711
- Enrolled in Medicare for any reason other than age  
n=97 484
- Ever had oophorectomy in Medicare claims  
n=10 374
- Not in SEER registry area by index date  
n=14 703
- Not continuously enrolled in Medicare parts A and B in the 1 year period 2–3 years before index date  
n=105 266
- Enrolled in an HMO any time in the 1 year period 2–3 years before index date  
n=99 963

**Supplemental Table 1. Morphology codes included in the histotype classifications for this analysis (cancer site: ovarian or fallopian tube)**

| <b>Histotype</b>                  | <b>ICD-O-3 codes</b>                                                                                                                                                                                                                                                   |
|-----------------------------------|------------------------------------------------------------------------------------------------------------------------------------------------------------------------------------------------------------------------------------------------------------------------|
| <b>Serous (n=7,543)</b>           | 8441, 8442, 8460, 8461, 8462, 9014                                                                                                                                                                                                                                     |
| <b>Endometrioid (n=1,114)</b>     | 8380, 8381, 8382, 8383, 8560, 8570                                                                                                                                                                                                                                     |
| <b>Clear Cell (n=386)</b>         | 8310, 8313                                                                                                                                                                                                                                                             |
| <b>Mucinous (n=797)</b>           | 8470, 8471, 8480, 8481, 8482, 8490, 9015                                                                                                                                                                                                                               |
| <b>Other Epithelial (n=7,010)</b> | 8005, 8010, 8012, 8013, 8015, 8020, 8021, 8022, 8031, 8032, 8033, 8040, 8041, 8043, 8046, 8050, 8052, 8070, 8074, 8120, 8140, 8141, 8230, 8240, 8246, 8250, 8255, 8260, 8263, 8290, 8323, 8340, 8440, 8443, 8444, 8450, 8503, 8550, 8562, 8574, 8576, 8650, 8806, 9110 |

**Supplemental Table 2. Codes used to identify metabolic syndrome and its components, between 1994 and 2013 in SEER-Medicare linked data**

We used the following ICD-9-CM diagnosis codes, where x indicates that any value (or blank) is allowed in that digit:

| <b>Condition</b>                | <b>Codes</b>                                                                                                                                            |
|---------------------------------|---------------------------------------------------------------------------------------------------------------------------------------------------------|
| <b>Overweight, obesity</b>      | A diagnosis of unspecified or overweight/obesity/morbid obesity or central adiposity (278, 278.0, 278.0x, 278.1, V77.8 <sup>a</sup> )                   |
| <b>Impaired fasting glucose</b> | A diagnosis of type 2 diabetes or impaired fasting glucose (250.x0, 250.x2, 790.2x) <sup>b</sup>                                                        |
| <b>Hypertension</b>             | A diagnosis of hypertensive disease (401.xx through 405.xx)                                                                                             |
| <b>High triglycerides</b>       | A diagnosis of pure hyperglycemia, mixed hyperlipidemia, hyperchylomicronemia, or other unspecified hyperlipidemia (272.1x through 272.4x) <sup>c</sup> |
| <b>Low HDL cholesterol</b>      | A diagnosis of lipoprotein deficiency (272.5x)                                                                                                          |
| <b>Dysmetabolic syndrome</b>    | A diagnosis of metabolic syndrome (277.7) <sup>d</sup>                                                                                                  |

<sup>a</sup>Code for central adiposity (V77.8) only available from 2001-2007

<sup>b</sup>Codes 250, 250.x were not included because they generically reference both type 1 and 2 diabetes, and codes 250.x1 and 250.x3 were not included because they also include type 1 diabetes

<sup>c</sup>272, 272.0, 272.0x are not included

<sup>d</sup>Started use in 2001. Our primary definition of metabolic syndrome required this diagnosis or a diagnosis of 3 or more metabolic syndrome components

**Supplemental Table 3. Characteristics of the analytic population: patients with ovarian or fallopian tube cancer and controls identified between 1994 and 2013 in the SEER-Medicare linked data.**

|                                                             | Cases  |            | Controls |            |
|-------------------------------------------------------------|--------|------------|----------|------------|
|                                                             | n      | %          | n        | %          |
| <b>Mean age in years (SD)</b>                               | 16 850 | 77.1 (5.8) | 281 878  | 76.4 (6.5) |
| <b>Race/Ethnicity</b>                                       |        |            |          |            |
| Non-Hispanic White                                          | 14 918 | 88.5       | 238 174  | 84.5       |
| Non-Hispanic Black                                          | 1 056  | 6.3        | 21 991   | 7.8        |
| Hispanic                                                    | 201    | 1.2        | 5 303    | 1.9        |
| Asian                                                       | 385    | 2.3        | 9 041    | 3.2        |
| Other / unknown                                             | 290    | 1.7        | 7 369    | 2.6        |
| <b>Registry at diagnosis</b>                                |        |            |          |            |
| San Francisco                                               | 688    | 4.1        | 11 433   | 4.1        |
| Connecticut                                                 | 1 241  | 7.4        | 18 770   | 6.7        |
| Detroit                                                     | 1 484  | 8.8        | 20 774   | 7.4        |
| Hawaii                                                      | 182    | 1.1        | 3 936    | 1.4        |
| Iowa                                                        | 1 341  | 8.0        | 18 574   | 6.6        |
| New Mexico                                                  | 427    | 2.5        | 7 782    | 2.8        |
| Seattle                                                     | 1 214  | 7.2        | 15 892   | 5.6        |
| Utah                                                        | 542    | 3.2        | 7 158    | 2.5        |
| Atlanta                                                     | 656    | 3.9        | 9 476    | 3.4        |
| San Jose                                                    | 397    | 2.4        | 6 766    | 2.4        |
| Los Angeles                                                 | 1 386  | 8.2        | 21 980   | 7.8        |
| Rural Georgia                                               | 63     | 0.4        | 701      | 0.2        |
| Greater California                                          | 2 287  | 13.6       | 44 217   | 15.7       |
| Kentucky                                                    | 910    | 5.4        | 18 413   | 6.5        |
| Louisiana                                                   | 829    | 4.9        | 16 633   | 5.9        |
| New Jersey                                                  | 1 971  | 11.7       | 37 286   | 13.2       |
| Greater Georgia                                             | 1 232  | 7.3        | 22 087   | 7.8        |
| <b>Year of diagnosis</b>                                    |        |            |          |            |
| 1994                                                        | 568    | 3.4        | 21 588   | 7.7        |
| 1995                                                        | 581    | 3.4        | 16 213   | 5.8        |
| 1996                                                        | 612    | 3.6        | 14 387   | 5.1        |
| 1997                                                        | 547    | 3.2        | 13 138   | 4.7        |
| 1998                                                        | 545    | 3.2        | 12 132   | 4.3        |
| 1999                                                        | 525    | 3.1        | 11 774   | 4.2        |
| 2000                                                        | 1 035  | 6.1        | 11 265   | 4.0        |
| 2001                                                        | 1 057  | 6.3        | 10 310   | 3.7        |
| 2002                                                        | 1 046  | 6.2        | 10 103   | 3.6        |
| 2003                                                        | 984    | 5.8        | 9 788    | 3.5        |
| 2004                                                        | 979    | 5.8        | 10 392   | 3.7        |
| 2005                                                        | 1 002  | 5.9        | 11 076   | 3.9        |
| 2006                                                        | 1 096  | 6.5        | 11 768   | 4.2        |
| 2007                                                        | 936    | 5.6        | 12 217   | 4.3        |
| 2008                                                        | 1 047  | 6.2        | 12 894   | 4.6        |
| 2009                                                        | 946    | 5.6        | 13 085   | 4.6        |
| 2010                                                        | 876    | 5.2        | 14 137   | 5.0        |
| 2011                                                        | 853    | 5.1        | 16 370   | 5.8        |
| 2012                                                        | 810    | 4.8        | 19 530   | 6.9        |
| 2013                                                        | 805    | 4.8        | 29 711   | 10.5       |
| <b>State buy-in at any time during claims search period</b> |        |            |          |            |
| Yes                                                         | 1 892  | 11.2       | 41 957   | 14.9       |
| <b>History of smoking or tobacco use</b>                    |        |            |          |            |
|                                                             | 1 055  | 6.3        | 20 318   | 7.2        |
| <b>Metabolic syndrome<sup>a</sup></b>                       |        |            |          |            |
|                                                             | 3 751  | 22.3       | 65 041   | 23.1       |
| <b>Number of metabolic syndrome components</b>              |        |            |          |            |
| 0                                                           | 3 085  | 18.3       | 65 943   | 23.4       |
| 1                                                           | 4 517  | 26.8       | 72 573   | 25.7       |
| 2                                                           | 5 524  | 32.8       | 78 822   | 28.0       |
| ≥3                                                          | 3 724  | 22.1       | 64 540   | 22.9       |

|                                 |        |      |         |      |
|---------------------------------|--------|------|---------|------|
| <b>Central adiposity</b>        | 14     | 0.1  | 362     | 0.1  |
| <b>Overweight / obesity</b>     | 1 328  | 7.9  | 24 997  | 8.9  |
| <b>Impaired fasting glucose</b> | 4 770  | 28.3 | 82 922  | 29.4 |
| <b>Hypertension</b>             | 12 168 | 72.2 | 191 822 | 68.1 |
| <b>High triglycerides</b>       | 8 958  | 53.2 | 135 329 | 48.0 |
| <b>Low HDL cholesterol</b>      | 104    | 0.6  | 1 870   | 0.7  |
| <b>Cancer characteristics</b>   |        |      |         |      |
| <b>Histology</b>                |        |      |         |      |
| Serous                          | 7 543  | 44.8 | --      | --   |
| Endometrioid                    | 1 114  | 6.6  | --      | --   |
| Mucinous                        | 386    | 2.3  | --      | --   |
| Clear Cell                      | 797    | 4.7  | --      | --   |
| Other Epithelial                | 7 010  | 41.6 | --      | --   |
| <b>Grade</b>                    |        |      |         |      |
| Low                             | 2 491  | 14.8 | --      | --   |
| High                            | 7 369  | 43.7 | --      | --   |
| Missing                         | 6 990  | 41.5 | --      | --   |

n=number SD=standard deviation

<sup>a</sup>The primary definition of metabolic syndrome presented in our analyses was: 3 or more signs for metabolic syndrome (central adiposity or overweight/obesity, impaired fasting glucose [including type II diabetes], high blood pressure, high triglycerides, low HDL cholesterol) and/or a diagnosis of ‘dysmetabolic syndrome.’

**Supplemental Table 4. Associations between metabolic syndrome, its components, and ovarian or fallopian tube cancer by race/ethnicity, SEER-Medicare linked data (1994–2013)**

|                                                | Non-Hispanic White |           | Non-Hispanic Black |           | Hispanic        |           | Asian           |           | P <sup>b</sup> |
|------------------------------------------------|--------------------|-----------|--------------------|-----------|-----------------|-----------|-----------------|-----------|----------------|
|                                                | OR <sup>a</sup>    | 95% CI    | OR <sup>a</sup>    | 95% CI    | OR <sup>a</sup> | 95% CI    | OR <sup>a</sup> | 95% CI    |                |
| <b>Metabolic syndrome</b><br>(≥3 vs.<3)        | 0.86               | 0.82–0.89 | 0.89               | 0.77–1.03 | 0.73            | 0.53–1.01 | 0.99            | 0.78–1.25 | 0.27           |
| <b>Number of metabolic syndrome components</b> |                    |           |                    |           |                 |           |                 |           |                |
| 0                                              | --                 | Reference | --                 | Reference | --              | Reference | --              | Reference | 0.16           |
| 1                                              | 1.22               | 1.16–1.28 | 1.68               | 1.34–2.10 | 1.15            | 0.69–1.80 | 1.08            | 0.75–1.56 |                |
| 2                                              | 1.21               | 1.15–1.28 | 1.57               | 1.26–1.95 | 1.10            | 0.70–1.74 | 1.20            | 0.86–1.68 |                |
| ≥3                                             | 1.00               | 0.95–1.06 | 1.32               | 1.05–1.67 | 0.80            | 0.50–1.27 | 1.13            | 0.79–1.61 |                |
| Overweight/obesity                             | 0.82               | 0.77–0.88 | 0.93               | 0.77–1.12 | 0.77            | 0.50–1.20 | 0.90            | 0.54–1.50 | 0.44           |
| Impaired fasting glucose                       | 0.89               | 0.85–0.92 | 1.01               | 0.89–1.16 | 0.87            | 0.64–1.17 | 1.07            | 0.86–1.33 | 0.06           |
| Hypertension                                   | 1.07               | 1.03–1.12 | 1.34               | 1.11–1.60 | 0.84            | 0.60–1.19 | 1.14            | 0.87–1.48 | 0.12           |
| High triglycerides                             | 1.06               | 1.02–1.10 | 0.91               | 0.79–1.05 | 0.91            | 0.66–1.25 | 1.07            | 0.85–1.35 | 0.27           |

n=number, OR= odds ratio, CI=confidence interval

<sup>a</sup>Logistic regression models were run separately for each exposure. Models were adjusted for diagnosis date, age, race, geographic location, state Medicare buy-in, history of smoking or tobacco use, and length of Medicare enrollment. Models for women in the “other race” group are suppressed due to model instability, but these women were included when assessing effect modification (see below).

<sup>b</sup>To assess effect modification across race groups, we used likelihood ratio tests comparing nested models with and without an interaction term between race and each of the metabolic syndrome exposures.

**Supplemental Table 5. Prevalence estimates for metabolic syndrome components, by metabolic syndrome status and number of documented components**

|                          |                          | Metabolic syndrome <sup>a</sup> |        |       |        | Number of metabolic syndrome signs <sup>b</sup> |        |       |        |       |      |
|--------------------------|--------------------------|---------------------------------|--------|-------|--------|-------------------------------------------------|--------|-------|--------|-------|------|
|                          |                          | No                              |        | Yes   |        | 1                                               |        | 2     |        | 3+    |      |
|                          |                          | n                               | %      | n     | %      | n                                               | %      | n     | %      | n     | %    |
| Cases                    | Central adiposity        | -- <sup>c</sup>                 | --     | --    | --     | --                                              | --     | --    | --     | --    | --   |
|                          | Overweight / obesity     | 287                             | 2.2    | 1 041 | 27.8   | 39                                              | 0.9    | 249   | 4.5    | 1 040 | 27.9 |
|                          | Impaired fasting glucose | 1 424                           | 10.9   | 3 346 | 89.2   | 213                                             | 4.7    | 1 218 | 22.0   | 3 339 | 89.7 |
|                          | Hypertension             | 8 444                           | 64.5   | 3 724 | 99.3   | 3 204                                           | 70.9   | 5 260 | 95.2   | 3 704 | 99.5 |
|                          | High triglycerides       | 5 351                           | 40.9   | 3 607 | 96.2   | 1 057                                           | 23.4   | 4 313 | 78.1   | 3 588 | 96.3 |
|                          | Low HDL cholesterol      | --                              | --     | --    | --     | --                                              | --     | --    | --     | --    | --   |
|                          | Controls                 | Central adiposity               | 74     | <0.1  | 288    | 0.4                                             | 15     | <0.1  | 60     | 0.1   | 287  |
| Overweight / obesity     | 4 434                    | 2.0                             | 20 563 | 31.6  | 691    | 1.0                                             | 3 763  | 4.8   | 20 543 | 31.8  |      |
| Impaired fasting glucose | 24 508                   | 11.3                            | 58 414 | 89.8  | 3 942  | 5.4                                             | 20 667 | 26.2  | 58 313 | 90.4  |      |
| Hypertension             | 127 196                  | 58.7                            | 64 626 | 99.4  | 53 033 | 73.1                                            | 74 537 | 94.6  | 64 252 | 99.6  |      |
| High triglycerides       | 72 976                   | 33.7                            | 62 353 | 95.9  | 14 869 | 20.5                                            | 58 467 | 74.2  | 61 993 | 96.1  |      |
| Low HDL cholesterol      | 247                      | 0.1                             | 1 623  | 2.5   | 38     | 0.1                                             | 210    | 0.3   | 1 622  | 2.5   |      |

n=number

<sup>a</sup>The primary definition of metabolic syndrome presented in our analyses was: 3 or more metabolic syndrome components (shown above) and/or a diagnosis of 'dysmetabolic syndrome.' Women meeting this definition were compared to a referent group of those not meeting it (i.e., including those with only one or two signs). When comparing the number of metabolic syndrome signs with which women were diagnosed, those without signs are the reference group.

<sup>b</sup>Numbers for women without any metabolic syndrome components not shown.

<sup>c</sup>Numbers suppressed due to small cell size.
